# Supplementary material
Source: publisher figshare collection journal article supplement (https://springernature.figshare.com/ndownloader/files/31581029)
Supplement: Supplementary file 1 [file 31581029]

Measurement(s),short term hematopoietic stem cell • long term hematopoietic stem cell • multipotent stem cell
Technology Type(s),RNA sequencing
Factor Type(s),read length
Sample Characteristic - Organism,Mus musculus
